# Supplementary material
Source: PubMed Central journal article supplement (PMC3876820)
Supplement: supp_mol.113.086868_Bead_Supplementary_Data_612.pdf [file supp_mol.113.086868_Bead_Supplementary_Data_612.pdf]

## **Molecular Pharmacology**

### **Supplemental Data**

#### **Segregation of family A GPCR protomers in the plasma membrane**

Anthony Gavalas, Tien-Hung Lan, Qiuju Liu, Ivan R. Corrêa Jr., Jonathan A. Javitch and Nevin A. Lambert

Department of Pharmacology and Toxicology, Medical College of Georgia, Georgia Regents University, Augusta, GA 30912-2300 USA (A.G., T.L., Q.L. and N.A.L)

New England Biolabs, Inc., Ipswich, MA 01938 USA (I.R.C.)

Departments of Psychiatry and Pharmacology, College of Physicians and Surgeons, Columbia University, New York, NY 10032 USA (J.A.J.)

Division of Molecular Therapeutics, New York State Psychiatric Institute, New York, NY 10032 USA (J.A.J.)

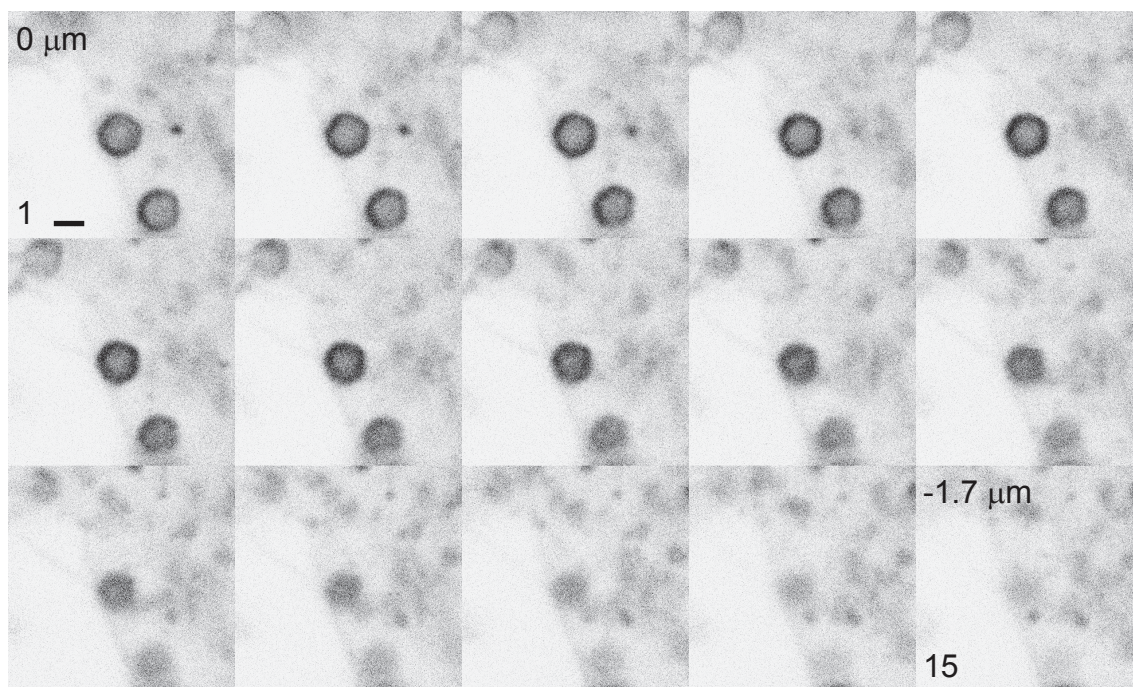

**Supplemental Figure 1.** A montage (z-stack) of images of bead-induced domains of His- $\beta_2$ AR-venus. Profiles of bead-induced domains appear smaller as the image plane moves towards the bottom of each bead. Image number 1 and image number 15 are labeled, and the depth of the image in the z-axis is indicated. Scale bar in image 1, 1  $\mu$ m.

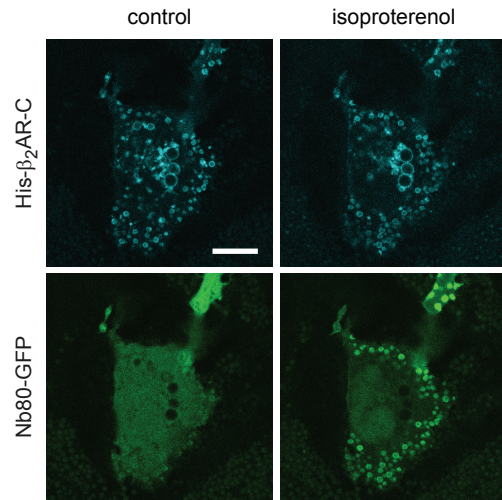

**Supplemental Figure 2.** Recruitment of cytosolic Nb80-GFP to bead-attached His-β<sub>2</sub>AR-cerulean. Confocal images showing bead-associated His-β<sub>2</sub>AR-cerulean and Nb80-GFP before and after agonist stimulation (10 μM isoproterenol). Scale bar, 10 μm.

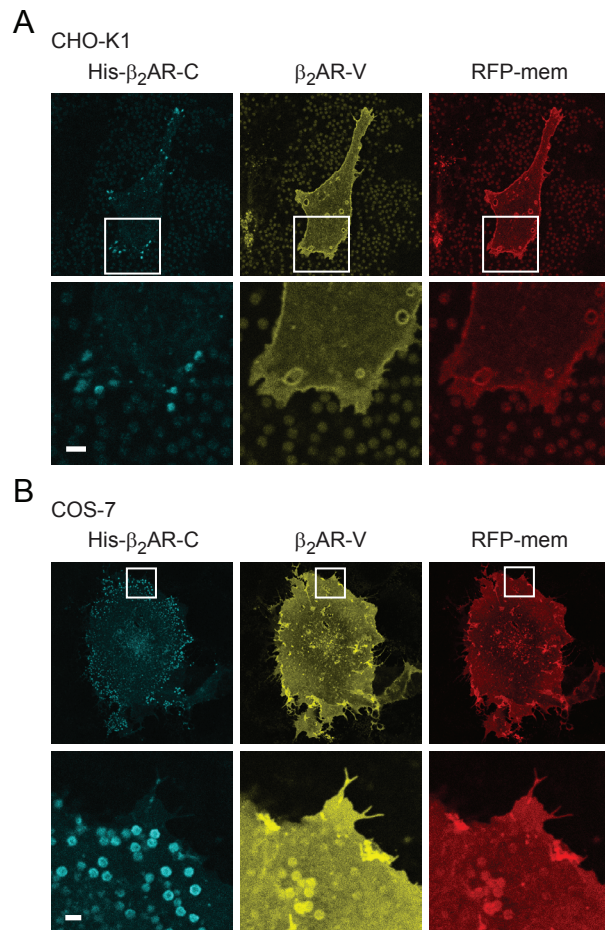

**Supplemental Figure 3.** Recruitment of His- $\beta_2$ AR-cerulean to IMAC beads without corecruitment of  $\beta_2$ AR-venus in (A) CHO-K1 and (B) COS-7 cells. Scale bars, 2  $\mu$ m.

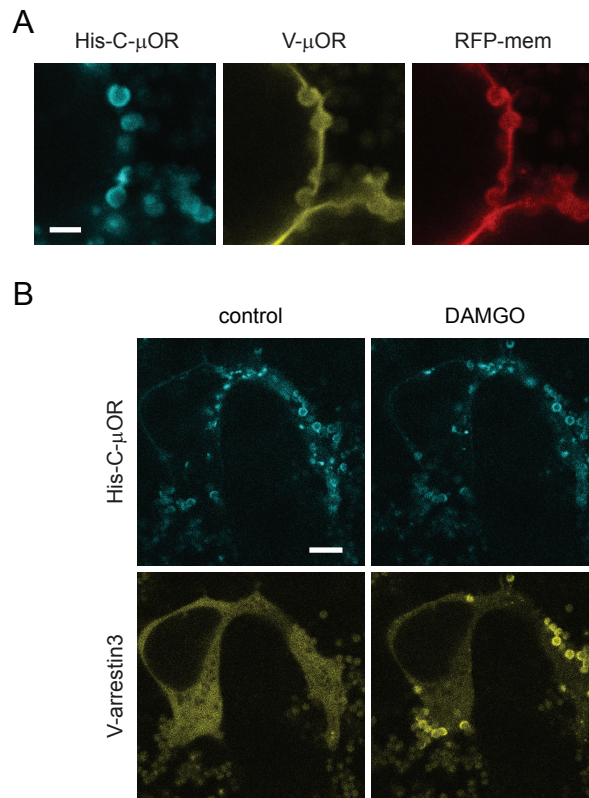

**Supplemental Figure 4.** Recruitment of His-C- $\mu$ -OR to IMAC beads. (A) His-C- $\mu$ -OR protomers do not corecruit untagged V- $\mu$ -OR protomers to IMAC beads. Scale bar, 2  $\mu$ m. (B) His-C- $\mu$ -OR protomers recruit V-arrestin3 from the cytosol to the bead-associated plasma membrane after agonist stimulation (10  $\mu$ M DAMGO). Scale bar, 5  $\mu$ m.

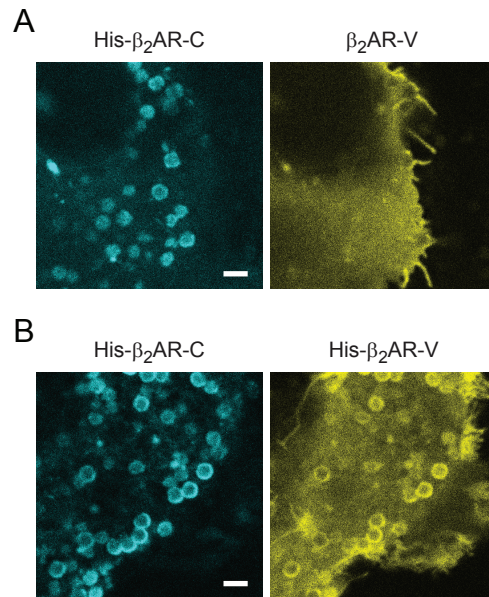

**Supplemental Figure 5.** IMAC beads that recruit His- $\beta_2$ AR-cerulean have capacity to recruit additional (His- $\beta_2$ AR-venus) protomers. Cells expressed either His- $\beta_2$ AR-C and  $\beta_2$ AR-V (A), or His- $\beta_2$ AR-C and His- $\beta_2$ AR-V (B). RFP-mem (not shown) was also expressed in both cases. Scale bars, 2  $\mu$ m.

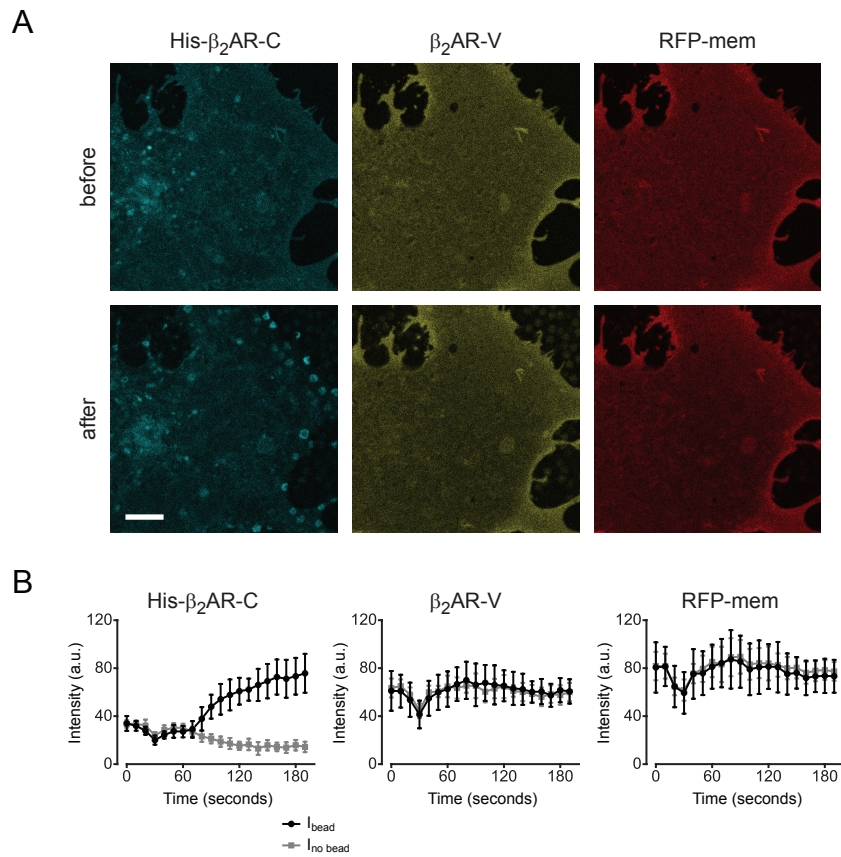

**Supplemental Figure 6.**  $\beta_2$ AR-venus fluorescence in bead-apposed ( $I_{\text{bead}}$ ) and surrounding ( $I_{\text{no bead}}$ ) regions of the plasma membrane is unchanged as His- $\beta_2$ AR-cerulean fluorescence increases. (A) Confocal images of His- $\beta_2$ AR-C,  $\beta_2$ AR-V, and RFP-mem fluorescence before and after formation of bead-induced domains. Scale bar, 5  $\mu\text{m}$ . (B) Time course data from the same cell shown in A. Data points represent the mean  $\pm$  S.D. of six bead-apposed and six surrounding ROIs, each 1  $\mu\text{m}$  in diameter. Beads are added 30 seconds after the start of the experiment.

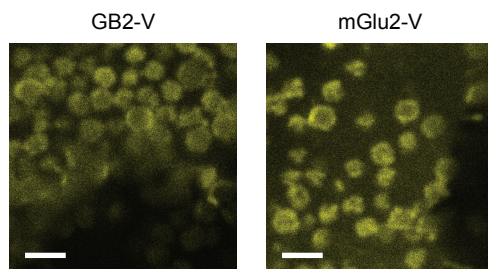

**Supplemental Figure 7.** Recruitment of untagged GABA(B) and metabotropic glutamate receptors to IMAC beads. Scale bars, 2  $\mu\text{m}$ .



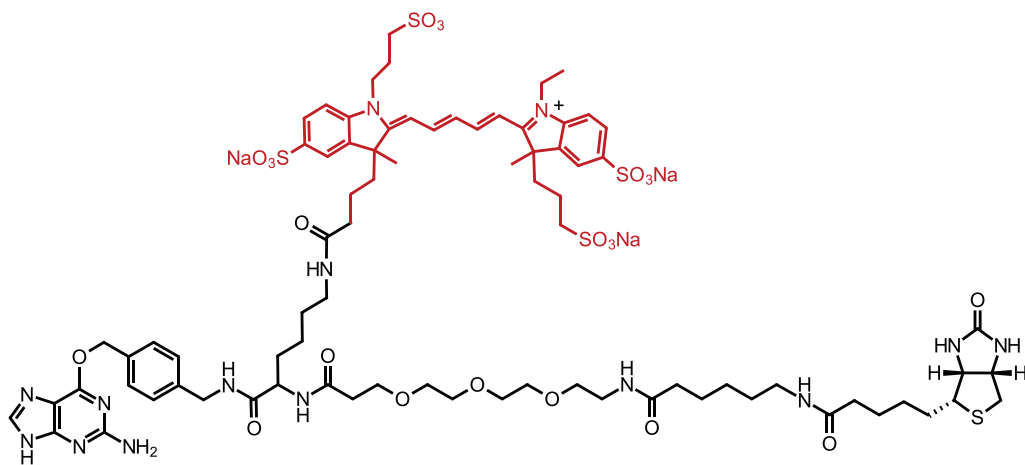

**Supplemental Figure 8.** The structure of BG-649-PEG-biotin.

## Supplemental Movie Legends

**Supplemental Movie 1.** IMAC beads recruit His- $\beta_2$ AR-venus. RFP-mem is used to normalize changes due to bead-induced membrane deformations. Frames were acquired every 10 seconds. The same cell is illustrated in Figure 1B.

**Supplemental Movie 2.** Recruitment of cytosolic Venus-arrestin3 to bead-associated His- $\beta_2$ AR-cerulean after stimulation with 10  $\mu$ M isoproterenol. Frames were acquired every 10 seconds. The same cell is illustrated in Figure 1C.

**Supplemental Movie 3.** Recruitment of cytosolic Nb80-GFP to bead-associated His- $\beta_2$ AR-cerulean after stimulation with 10  $\mu$ M isoproterenol. Frames were acquired every 5 seconds. The same cell is illustrated in Supplemental Figure 2.

**Supplemental Movie 4.** IMAC beads recruit His- $\beta_2$ AR-cerulean but do not corecruit  $\beta_2$ AR-venus. Frames were acquired every 10 seconds. The same cell is illustrated in Supplemental Figure 6.

**Supplemental Movie 5.** Segregation of His- $\beta_2$ AR-cerulean and SNAP- $\beta_2$ AR-venus by mixed IMAC and sAV beads. Frames were acquired every 10 seconds. The same cell is illustrated in Figure 4A.
